# Supplementary material for: An integrated metabolomics approach for the research of new cerebrospinal fluid biomarkers of multiple sclerosis
Source: Royal Society of Chemistry journal article supplement (doi:10.1039/c4mb00700j), 2015-02-06

**Supporting information of:**

**An integrated metabolomics approach for the research of new cerebrospinal  
fluid biomarkers of multiple sclerosis**

Damiana Pieragostino<sup>1,2</sup>, Michele D'Alessandro<sup>1,2</sup>, Maria di Ioia<sup>2,3</sup>, Claudia Rossi<sup>1,2</sup>, Mirco Zucchelli<sup>2,4</sup>, Andrea Urbani<sup>5</sup>, Carmine Di Ilio<sup>1,2</sup>, Alessandra Lugaesi<sup>2,3</sup>, Paolo Sacchetta<sup>1,2</sup> and Piero Del Boccio<sup>1,2</sup>

<sup>1</sup> Department of Medical, Oral and Biotechnological Sciences, University "G. d'Annunzio" of Chieti- Pescara, Chieti, Italy.

<sup>2</sup> Analytical Biochemistry and Proteomics Unit, Research Centre on Aging (Ce.S.I), University "G. d'Annunzio" of Chieti-Pescara, Chieti, Italy.

<sup>3</sup> Department of Neurosciences and Imaging, University "G. d'Annunzio" of Chieti-Pescara, Chieti, Italy.

<sup>4</sup> School of Medicine and Health Sciences, University "G. d'Annunzio" of Chieti-Pescara, Chieti, Italy.

<sup>5</sup> Department of Experimental Medicine and Surgery, University of Tor Vergata, Rome, Italy.

**Keywords:** Mass Spectrometry; Lipidomics; Metabolomics; CSF; Multiple Sclerosis; Biomarkers.

\*Corresponding Author:

Dr. Piero Del Boccio, PhD

Department of Medical, Oral and Biotechnological Sciences, University "G. d'Annunzio" of Chieti-Pescara, Chieti, Italy.

e-mail: [p.delboccio@unich.it](mailto:p.delboccio@unich.it)

Phone: +39 0871 541593

Fax: +39 0871 541598

**Table S1:** Demographic and clinical variables of the patient groups.

| Sample | Age at sample | Disease duration days | Phase at sample | Diagnosis                              | sex | Magnetic Resonance Data | Link Index (NV < 0,66) | OCB (PATTERN) | Barrier Index (NV < 5.5) | EDSS AT SAMPLE |
|--------|---------------|-----------------------|-----------------|----------------------------------------|-----|-------------------------|------------------------|---------------|--------------------------|----------------|
| 15 MuS | 48            | 3650                  | ACTIVE          | RRMS                                   | F   | TYPICAL, GD-            | 0.66                   | POS (2)       | 5.2                      | 4.5            |
| 08 MuS | 46            | 1095                  | ACTIVE          | RRMS                                   | M   | TYPICAL, GD ND          | 0.69                   | POS (2)       | 5.17                     | 2.5            |
| 10 MuS | 55            | 11315                 | ACTIVE          | RRMS                                   | F   | TYPICAL, GD -           | 1.17                   | POS (3)       | Regular                  | 2.5            |
| 11 MuS | 24            | 365                   | ACTIVE          | RRMS                                   | F   | TYPICAL, GD +           | 2.37                   | POS (3)       | 8.6                      | 2.5            |
| 09 MuS | 54            | 5475                  | ACTIVE          | RRMS                                   | F   | TYPICAL, GD -           | 0.65                   | POS (2)       | 2.83                     | 1.0            |
| 12 MuS | 40            | 1                     | ACTIVE          | RRMS                                   | F   | ATYPICAL, GD+           | 0.66                   | POS (2)       | 6.56                     | 2.5            |
| 03 MuS | 20            | 30                    | ACTIVE          | RRMS                                   | F   | TYPICAL, GD -           | 0.87                   | POS (2)       | 6.49                     | 1.5            |
| 13 MuS | 45            | 5475                  | ACTIVE          | RRMS                                   | M   | TYPICAL, GD -           | 0.59                   | POS (3)       | 15.2                     | 3.5            |
| 07 MuS | 48            | 15                    | ACTIVE          | RRMS                                   | M   | TYPICAL                 | 1.46                   | POS (2)       | 7.5                      | 2.0            |
| 17 MuS | 49            | 350                   | ACTIVE          | RRMS                                   | M   | TYPICAL, GD-            | 0.46                   | POS (3)       | 14.7                     | 3.0            |
| 14 MuS | 46            | 7                     | ACTIVE          | RRMS                                   | F   | TYPICAL, GD -           | Regular                | NEG           | Regular                  | 6.0            |
| 16 MuS | 36            | 1460                  | STABLE          | RRMS                                   | M   | TYPICAL, GD-            | 0.51                   | POS (2)       | 7.1                      | 1.0            |
| 04 MuS | 46            | 570                   | ACTIVE          | RRMS                                   | M   | TYPICAL, GD-            | 0.59                   | POS (2)       | 7.46                     | 4.0            |
| 16 OND | 45            | 90                    | ACTIVE          | ASPECIFIC<br>LEUKOENCEPHALOPATHY       | M   | ATYPICAL, GD-           | 0.45                   | NEG (1)       | 9.4                      | -              |
| 02 OND | 54            | -                     | STABLE          | CADASIL                                | F   | ATYPICAL, GD-           | Regular                | ND            | Regular                  | -              |
| 05 OND | 62            | 760                   | ACTIVE          | BLEEDING FROM CAVERNOMA,<br>VASCULITIS | F   | ATYPICAL, GD-           | Regular                | POS (3)       | Regular                  | -              |
| 04 OND | 35            | 7                     | ACTIVE          | ASPECIFIC<br>LEUKOENCEPHALOPATHY       | F   | ATYPICAL, GD-           | 0.5                    | ND            | 4.57                     | -              |
| 14 OND | 39            | 570                   | ACTIVE          | ASPECIFIC DIPLOPIA                     | F   | NORMAL                  | 0.29                   | NEG (1)       | 6.5                      | -              |
| 12 OND | 48            | -                     | ACTIVE          | STROKE                                 | F   | ATYPICAL, GD-           | Regular                | NEG (1)       | Regular                  | -              |
| 09 OND | 61            | -                     | -               | DEMENTIA                               | F   | ATYPICAL, GD-           | -                      | -             | -                        | -              |
| 06 OND | 48            | -                     | -               | AMYOTROPHIC LATERAL<br>SCLEROSIS       | M   | ATYPICAL, GD-           | Regular                | NEG (1)       | Regular                  | -              |
| 15 OND | 22            | 570                   | ACTIVE          | ASPECIFIC<br>LEUKOENCEPHALOPATHY       | F   | ATYPICAL, GD-           | 0.6                    | NEG (1)       | 5.1                      | -              |
| 01 OND | 59            | 7200                  | STABLE          | ASPECIFIC<br>LEUKOENCEPHALOPATHY       | F   | ATYPICAL, GD-           | Regular                | NEG (1)       | Regular                  | -              |
| 10 OND | 21            | -                     | STABLE          | CHIARI MALFORMATION TYPE<br>1, ANXIETY | M   | ATYPICAL, GD-           | 0.45                   | NEG (1)       | 4.4                      | -              |
| 07 OND | 45            | 3600                  | STABLE          | ASPECIFIC<br>LEUKOENCEPHALOPATHY       | F   | ATYPICAL, GD-           | 0.49                   | NEG (1)       | 4.6                      | -              |

RRMS= Relapsing-Remitting Multiple Sclerosis

Typical= indicates a Brain MRI suggestive of MuS, Atypical= indicates a Brain MRI not suggestive of MuS, GD+ = indicates presence of Gadolinium enhancement, GD-= indicates absence of Gadolinium enhancement, GD ND= indicates Gadolinium not done

OCB= Oligoclonal Bands are positive (POS) if the pattern is 2 or 3, are negative (NEG) if the pattern is 1 or 5.

Regular= indicates a value of Link or Barrier Index inferior the normal value (NV)

CADASIL= Cerebral Autosomal Dominant Arteriopathy with Subcortical Infarcts and Leukoencephalopathy.

ND = not definable.

## MALDI-TOF-MS analysis of CSF lipids

**Figure S1:**

**A)** mass accuracy (ppm) measured for DMPC standard at  $m/z=678,5069$  Da for the  $M+H^+$  ion and  $m/z= 700,4888$  Da For low signal of the  $M+Na^+$  ion and for an endogenous signal identified as PC (see Table 2) at  $m/z= 734,5695$  Da for the  $M+H^+$  ion, measured in each CSF sample analyzed. As reported in the figure in all samples acquired the mass error was below 10 ppm.

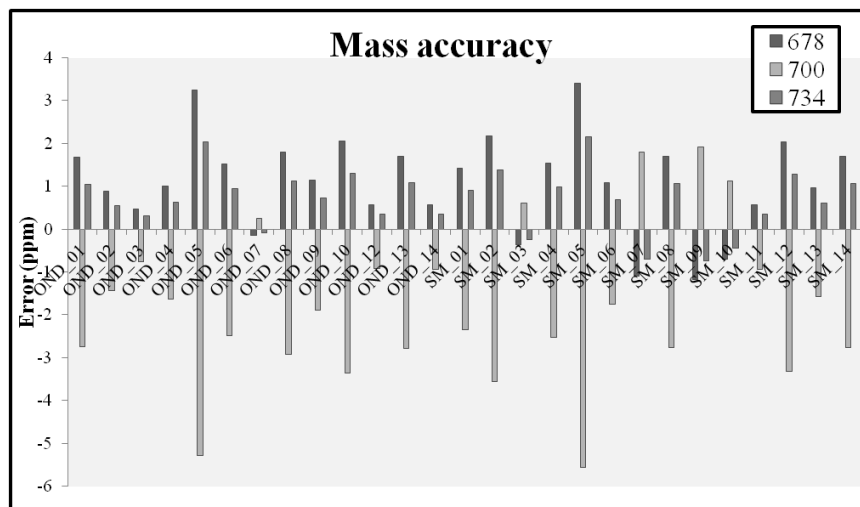

**B)** linearity response, expressed as signal to noise (S/N), of the MALDI-MS method on standard DMPC. Data were obtained by a CSF pool fortified with DMPC extracted and analysed with the described method at 2.5, 5, 10, 25  $\mu\text{g/mL}$ . Data were acquired in triplicate obtaining an RSD % below 20% of variability. A) DMPC signal at  $m/z= 678.5$  [ $M+H^+$ ]; B) DMPC signal at  $m/z= 700.5$  [ $M+Na^+$ ]. These  $m/z$  regions not contain endogenous signals (data not shown).

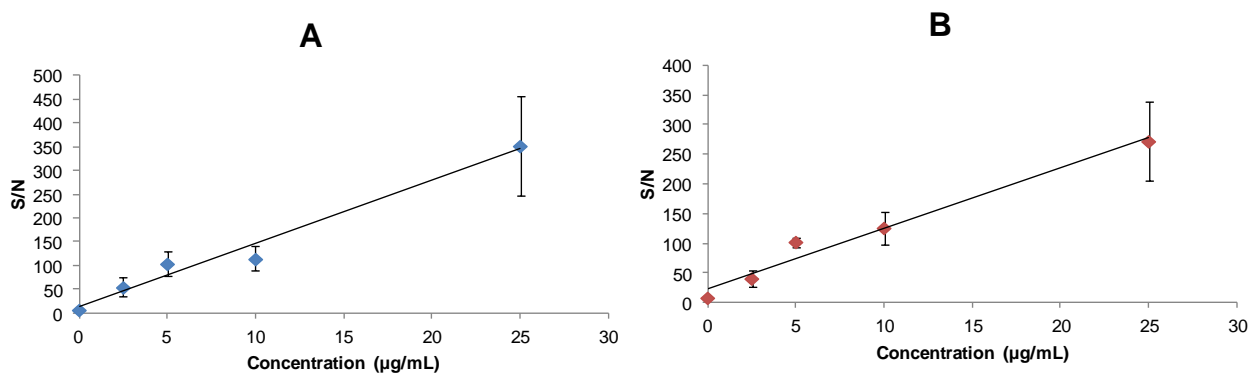

## Figure S2

MS/MS spectrum obtained by fragmentation of signal at  $m/z=522$  Da identified as Lysophosphatidylcholine (LPC). The fragment at  $m/z=184$ , 104 and 86 Da are specific of the polar head phosphocoline.

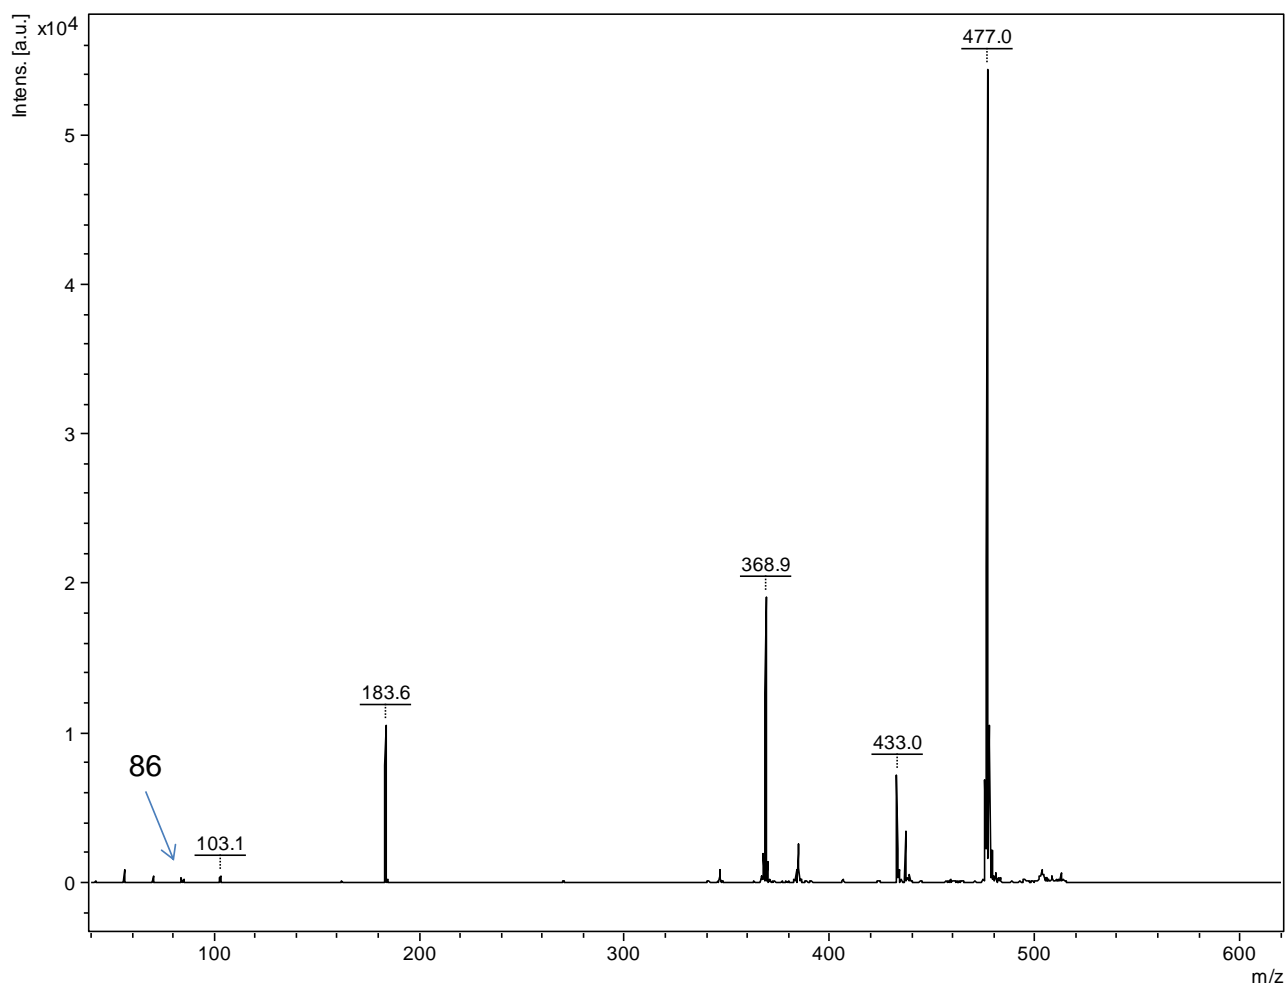

### Figure S3

MS/MS spectrum obtained by fragmentation of signal at  $m/z = 524$  Da identified as Lysophosphatidylcholine (LPC). The fragment at  $m/z = 184$ , 104 and 86 Da are specific of the polar head phosphocoline.

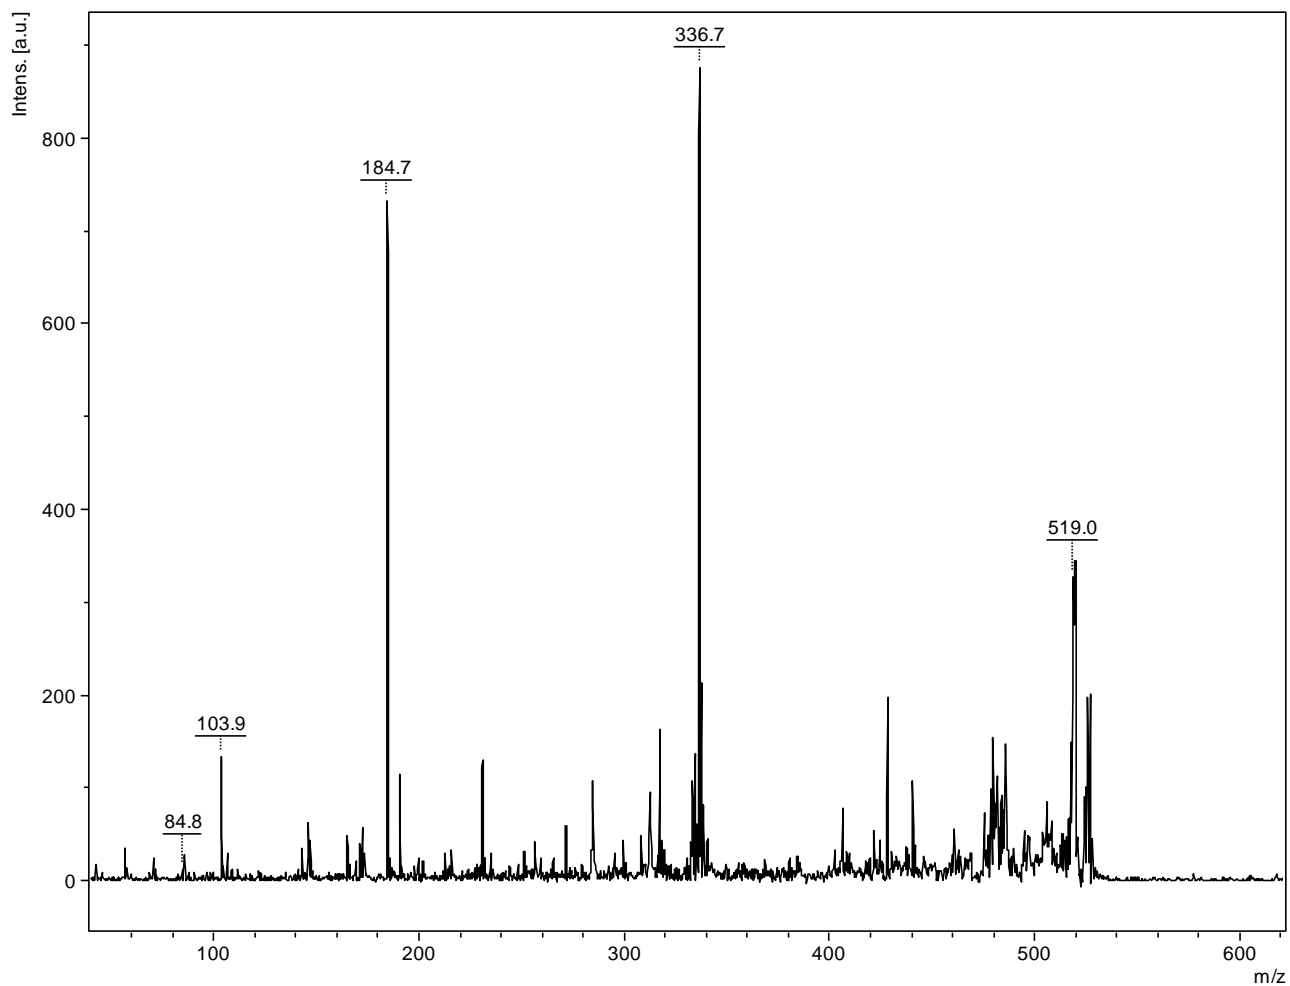

## Figure S4

MS/MS spectrum obtained by fragmentation of signal at  $m/z=734$  Da identified as a Phosphatidylcholine (PC). The fragment at  $m/z=184$ , 104 and 86 Da are specific of the polar head phosphocoline.

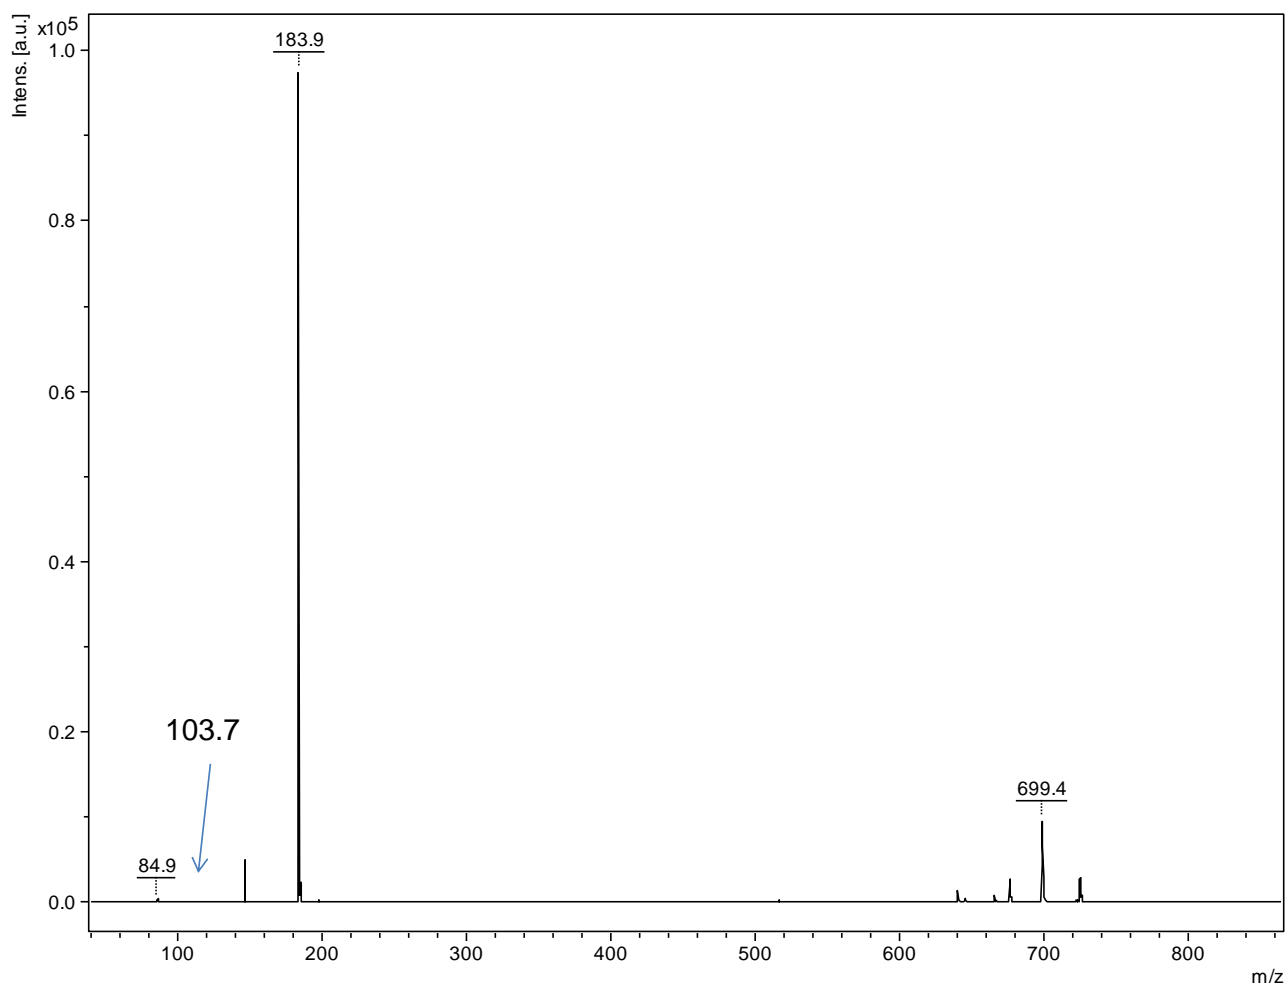

## Figure S5

Relative distribution between sexes of the highlighted discriminant compounds in CSF. Data were presented as means (error bars: 95% CI for mean) of normalized intensity within each clinical group investigated. No significant difference ( $p > 0.05$ ) females (F) vs males (M) was obtained for each signal examined. Panel A) OND; Panel B) MuS.

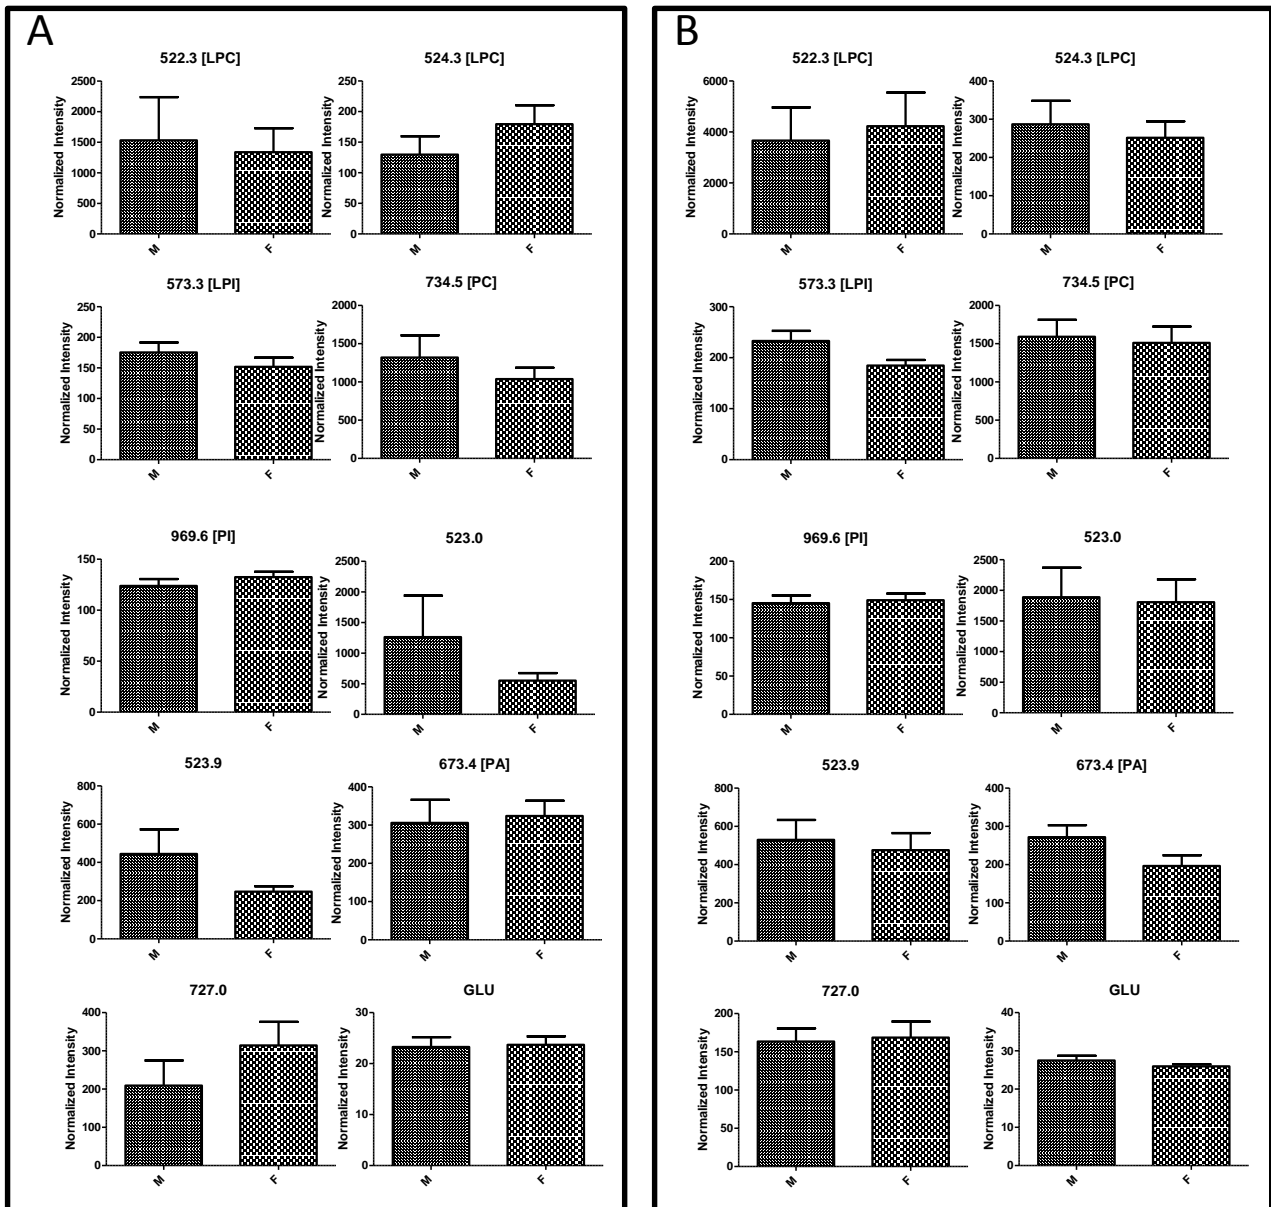

Supplement: c4mb00700j1.pdf [file c4mb00700j1.pdf]
